# Supplementary material
Source: ML conference proceedings conference paper supplement (https://openreview.net/forum?id=dgmcE0RsTi)

Per-iteration Latency

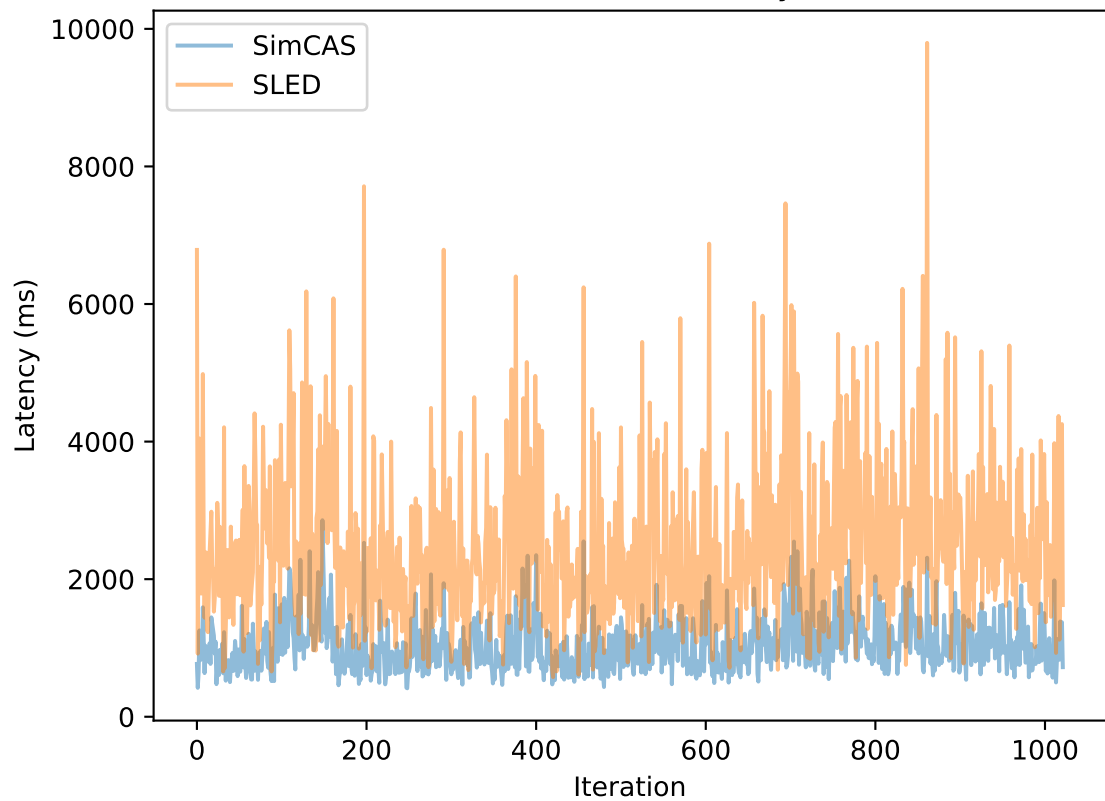

Supplement: supplementary_material [file attachment]

Per-iteration Latency

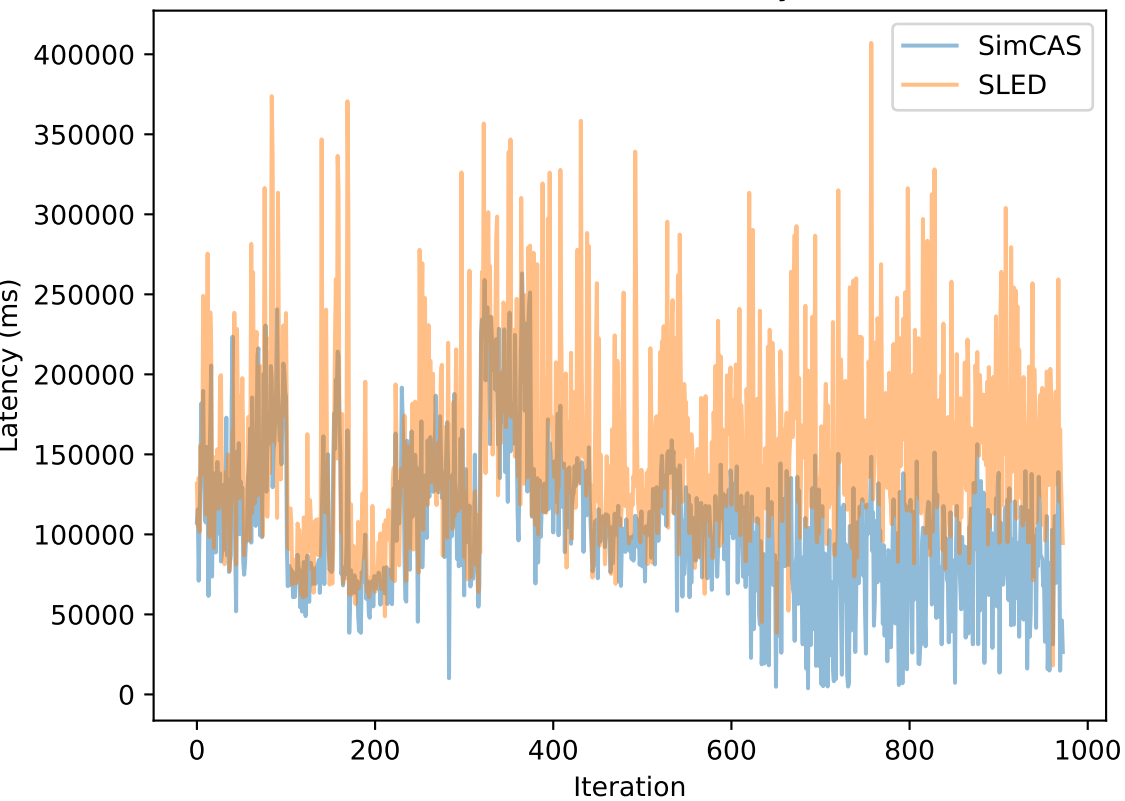

Supplement: supplementary_material [file attachment]

Per-iteration Latency

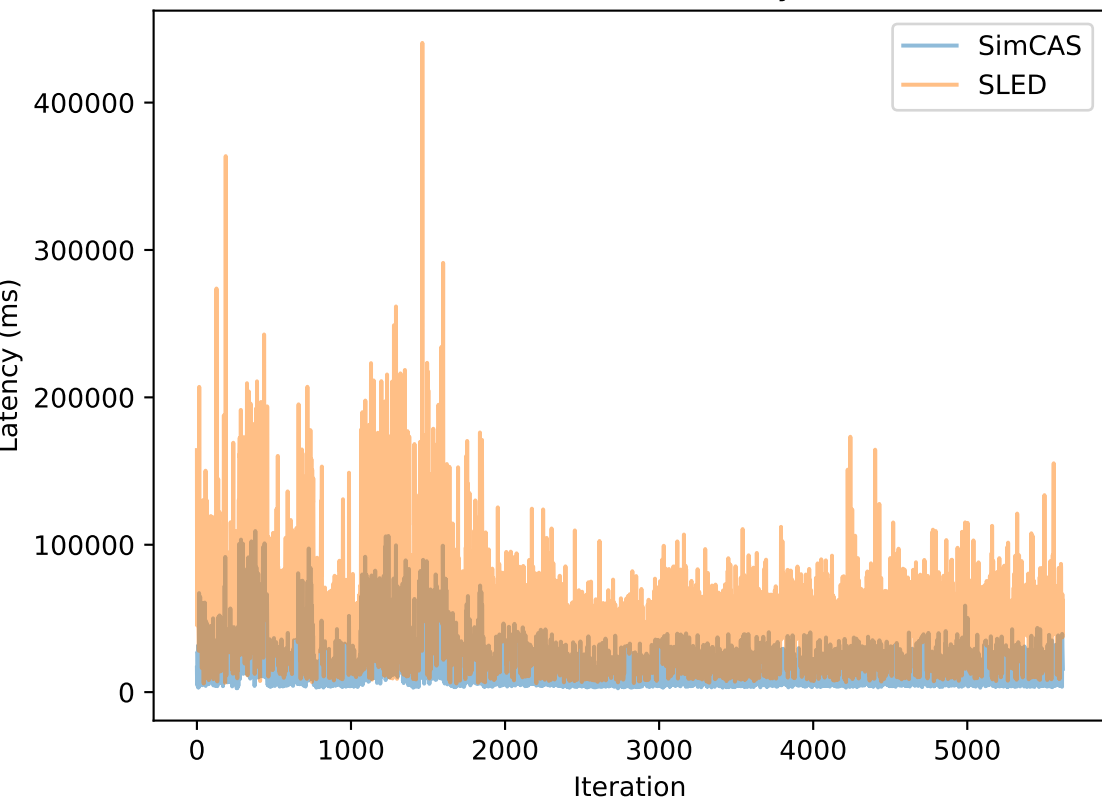

Supplement: supplementary_material [file attachment]

Per-iteration Latency

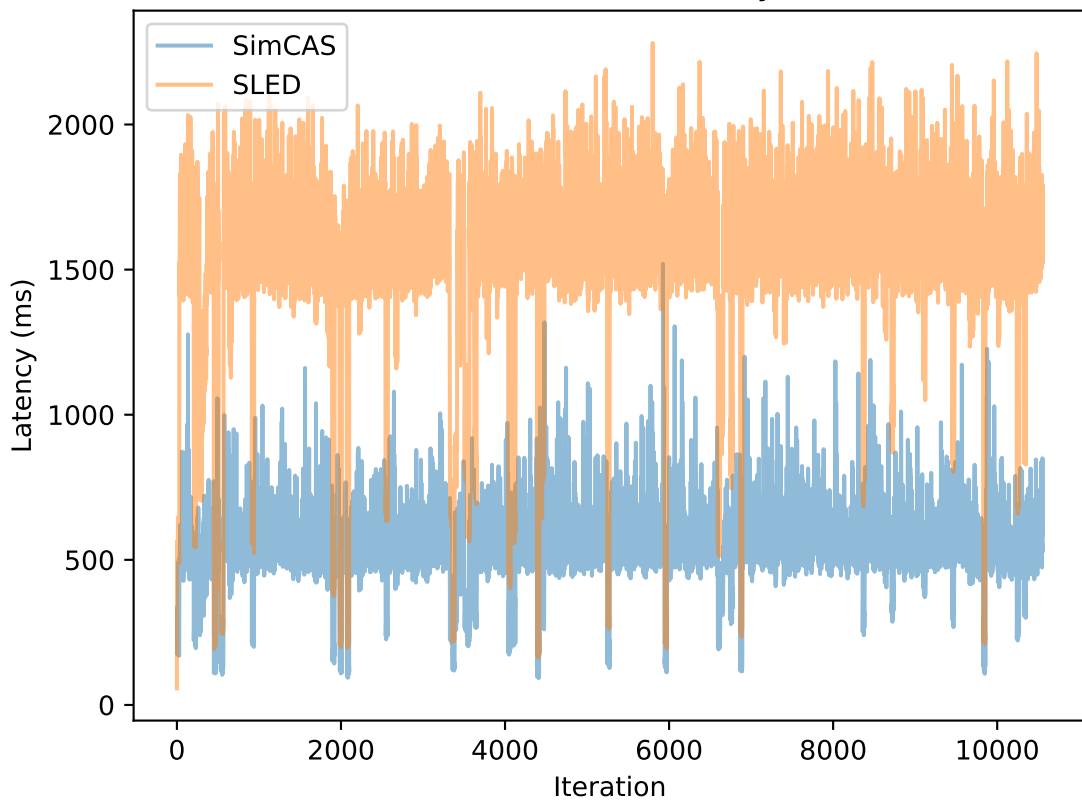

Supplement: supplementary_material [file attachment]

Per-iteration Latency

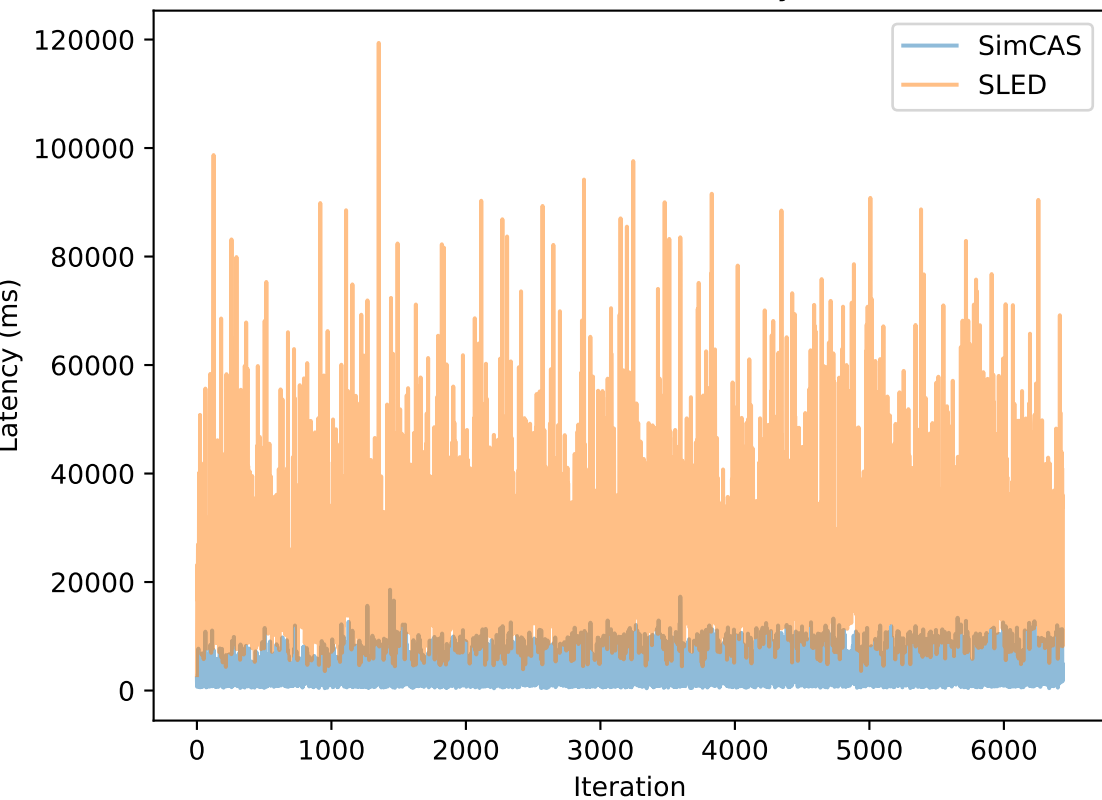

Supplement: supplementary_material [file attachment]

Per-iteration Latency

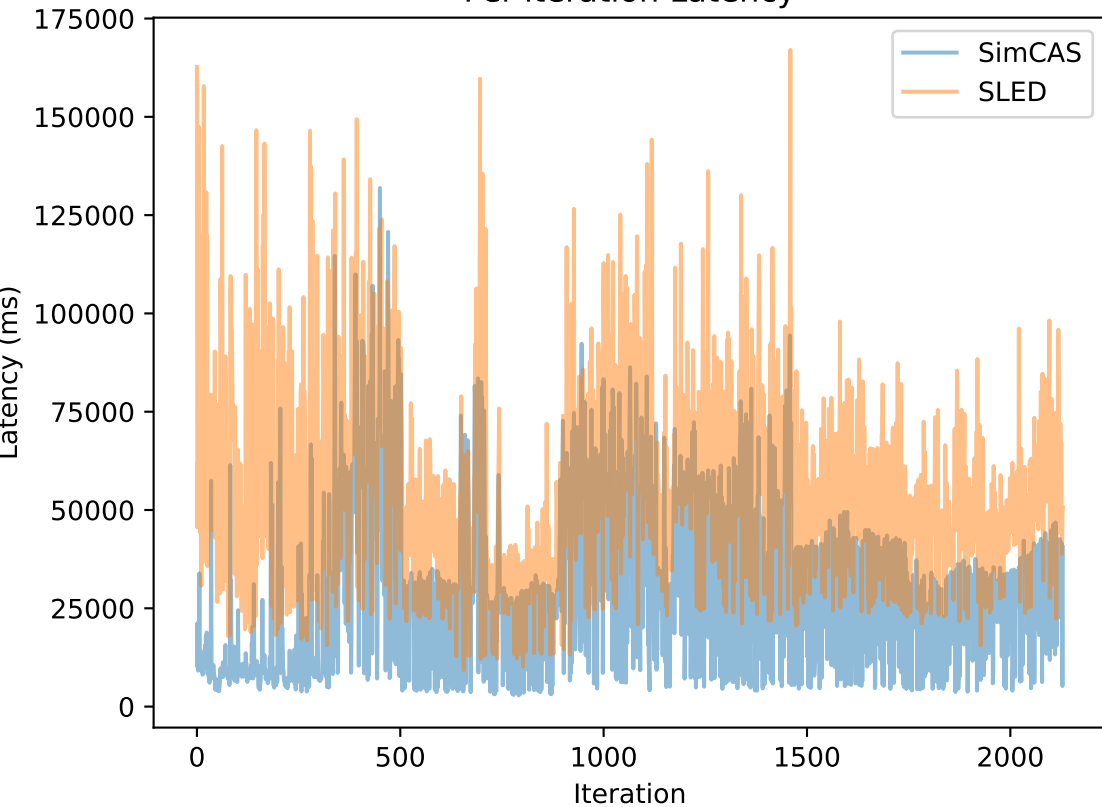

Supplement: supplementary_material [file attachment]

Per-iteration Latency

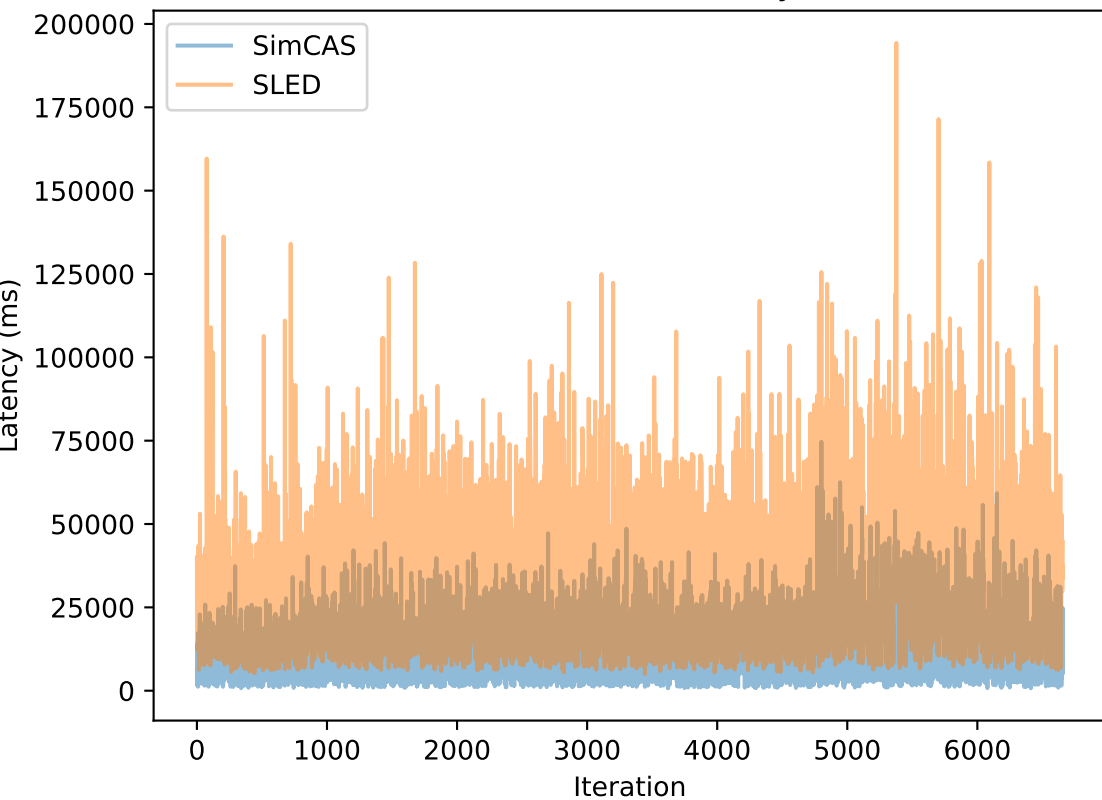

Supplement: supplementary_material [file attachment]
